# Supplementary material
Source: PubMed Central journal article supplement (PMC8327757)

Extended data figure 2A

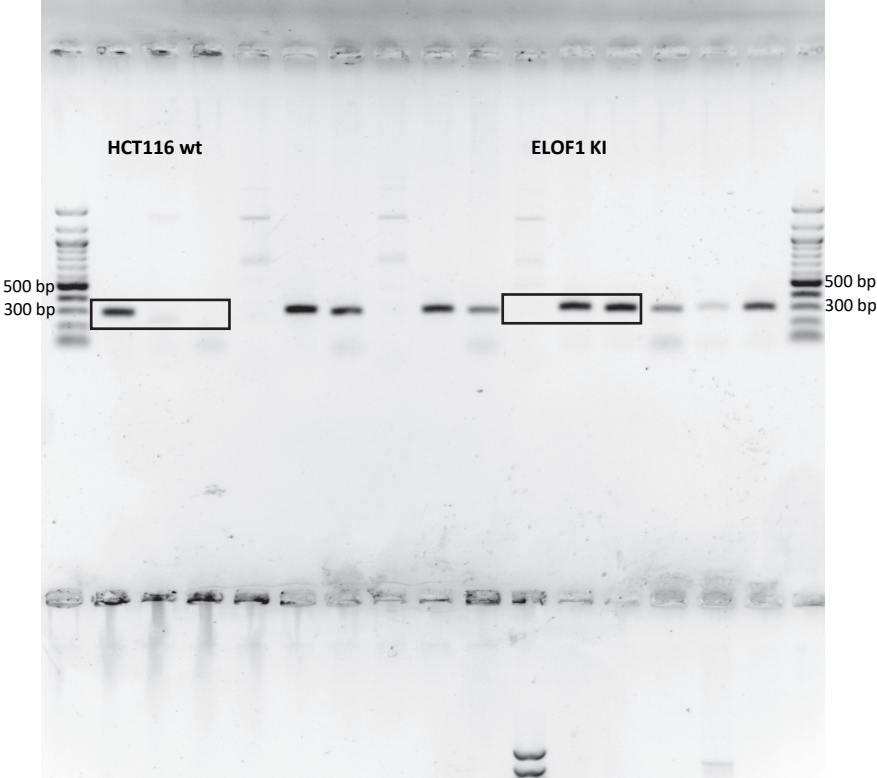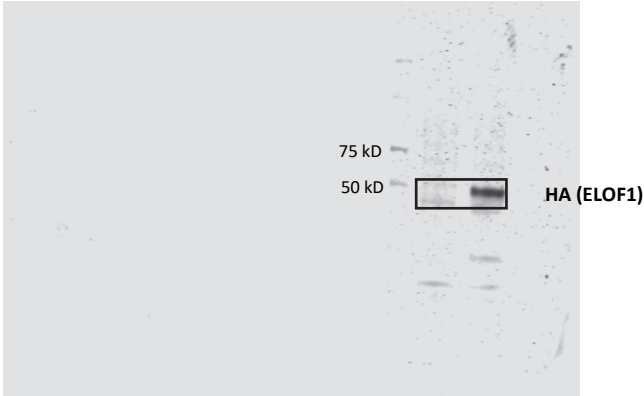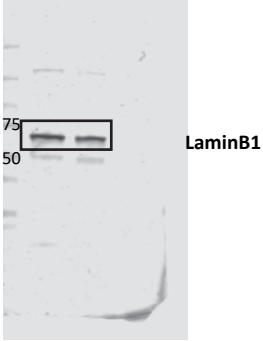

Extended data figure 2B

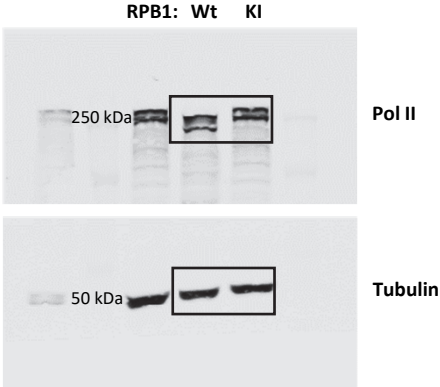

Extended data figure 2D

IP: P-Ser2-Pol II

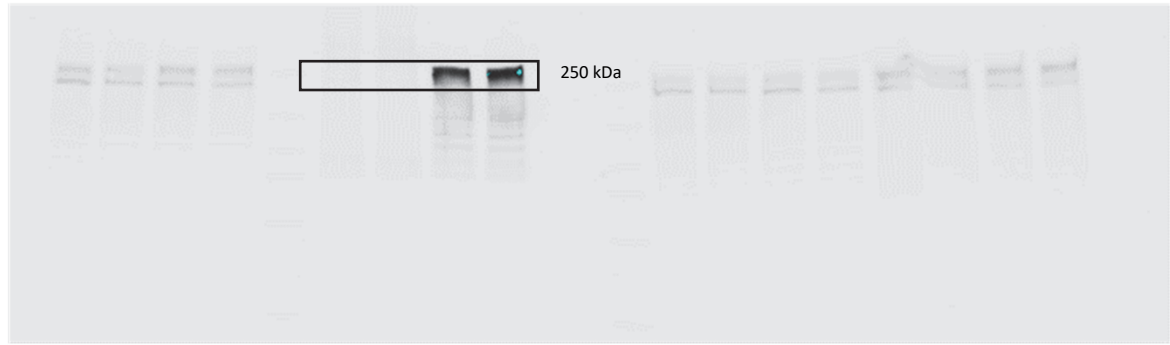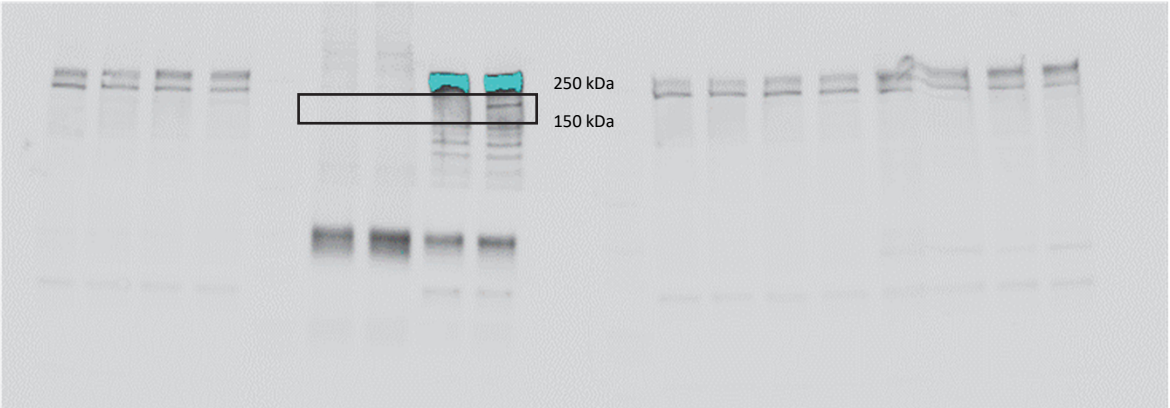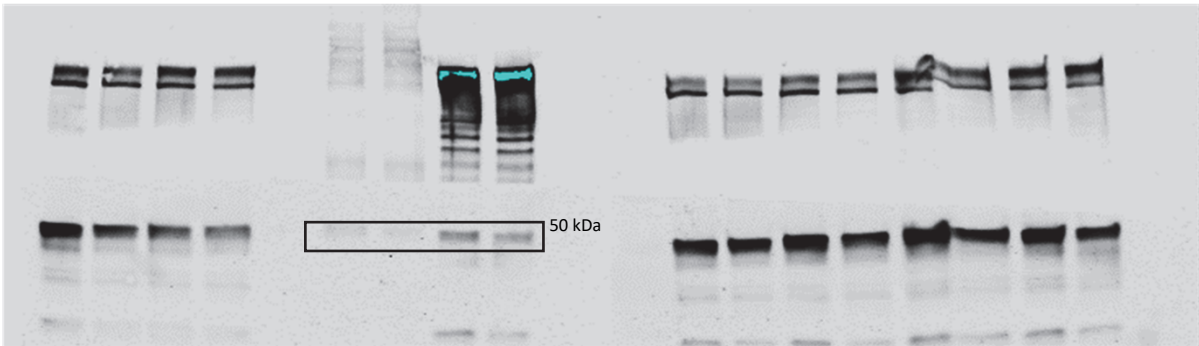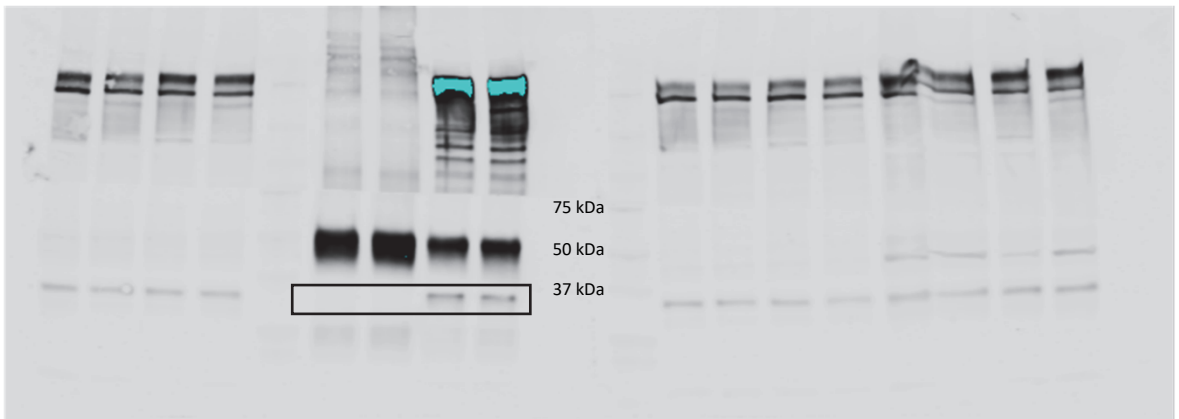

Extended data figure 2D (2)

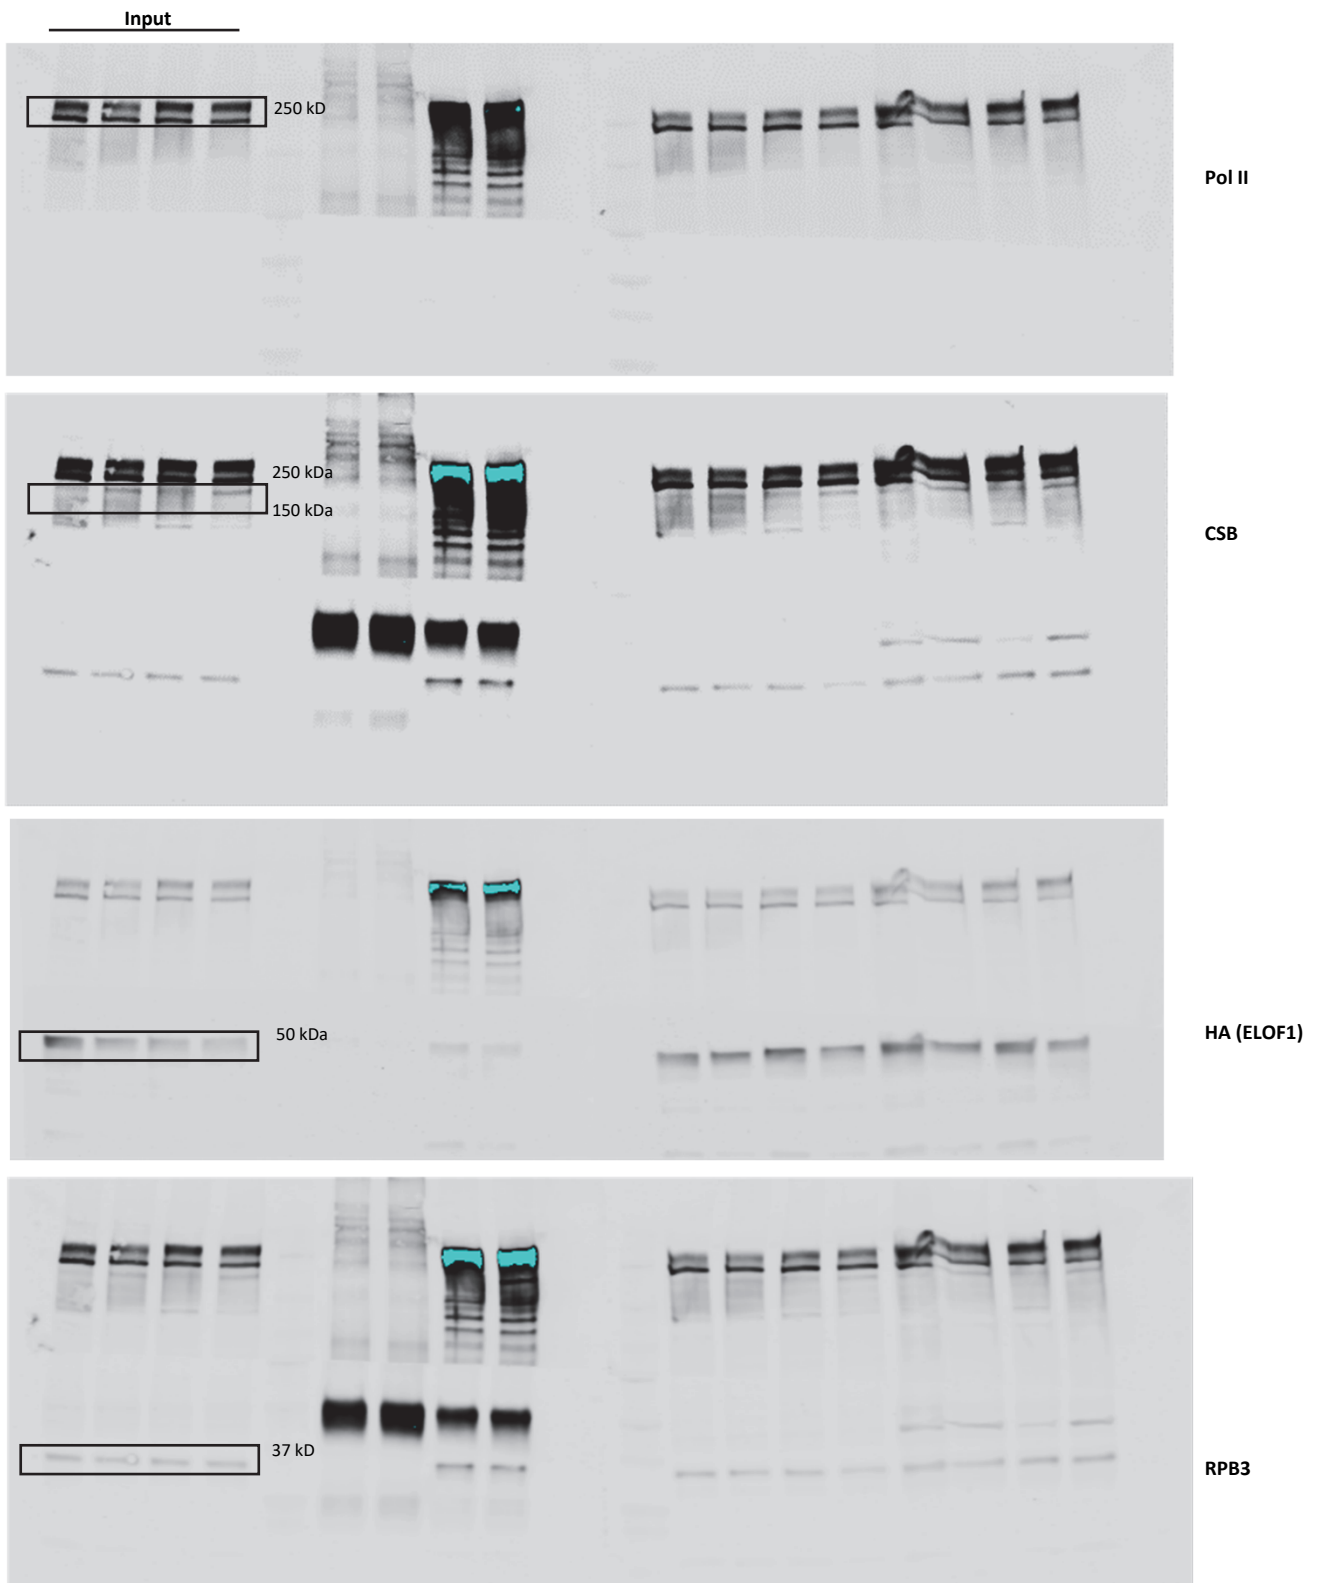

Extended data figure 2G

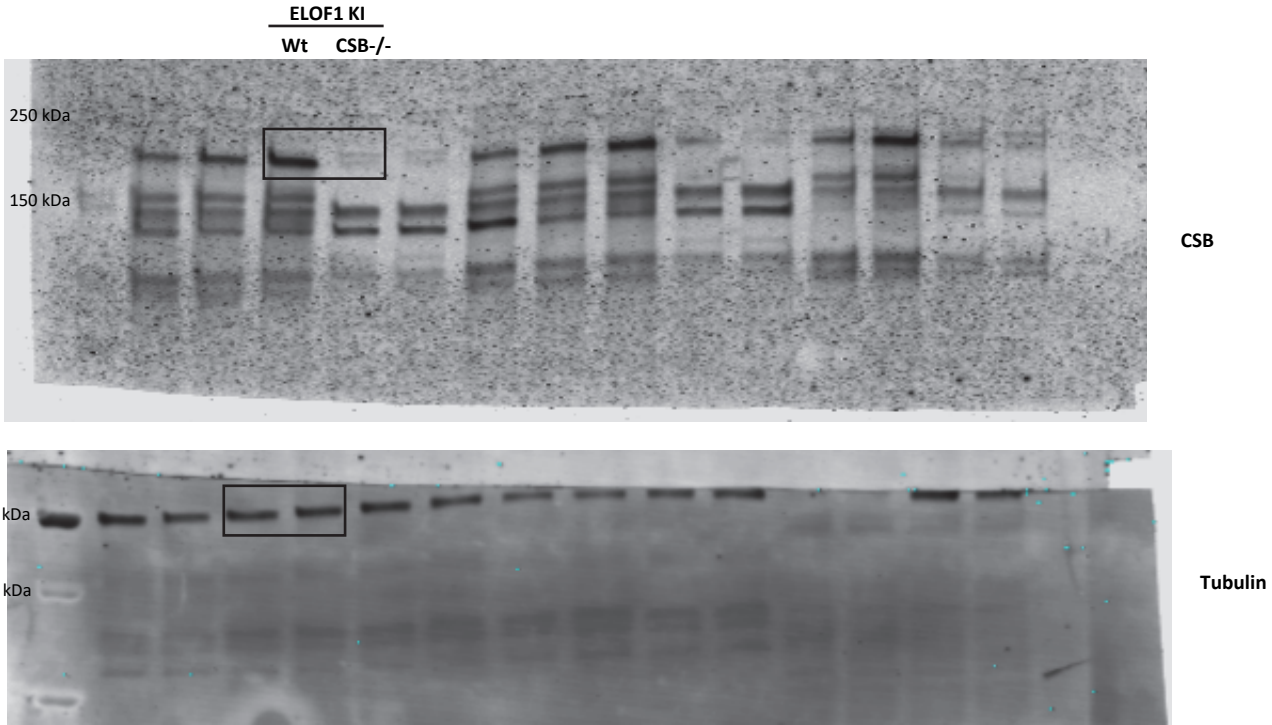

Supplement: NIHMS1715543-supplement-SourceGels_ExtendedFig2.pdf [file NIHMS1715543-supplement-SourceGels_ExtendedFig2.pdf]
