# Supplementary material
Source: PubMed Central journal article supplement (PMC8327757)

Extended data figure 6D

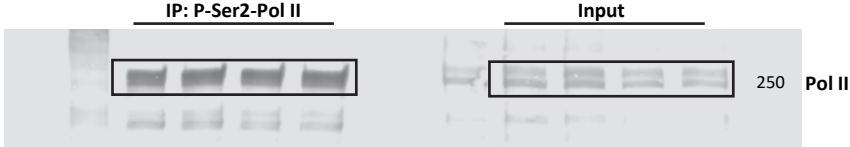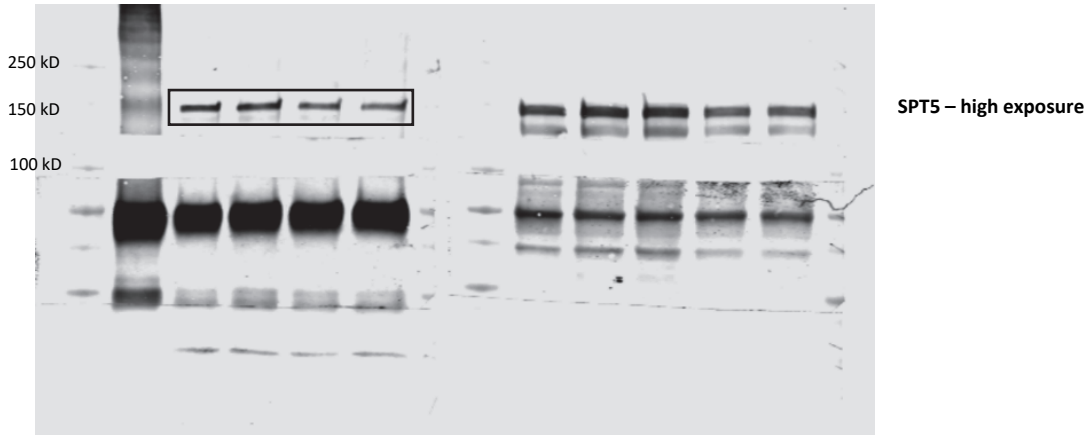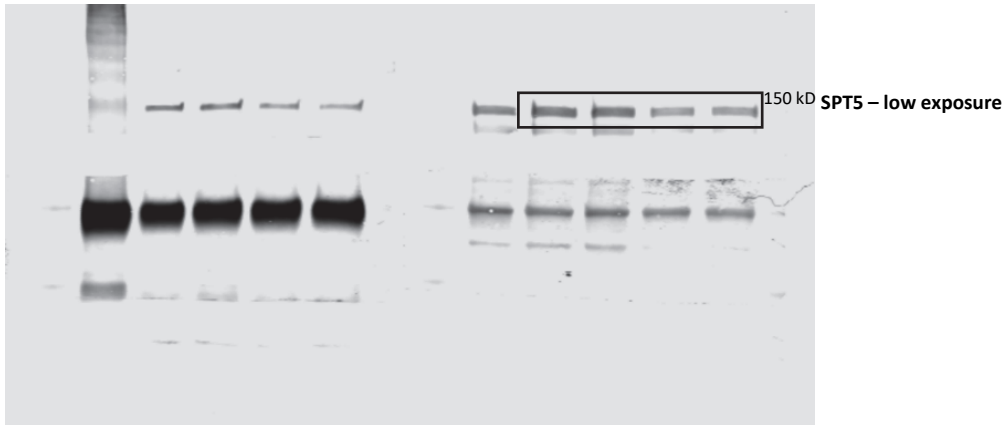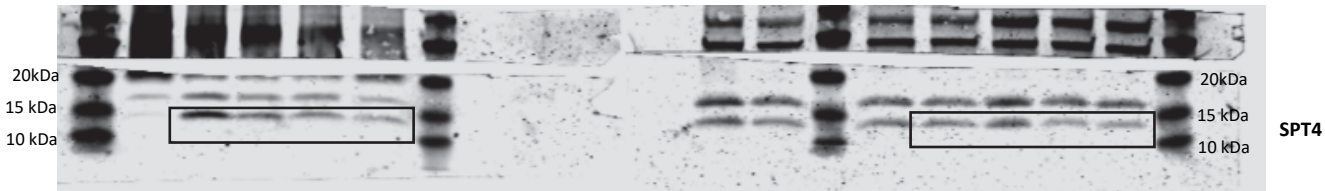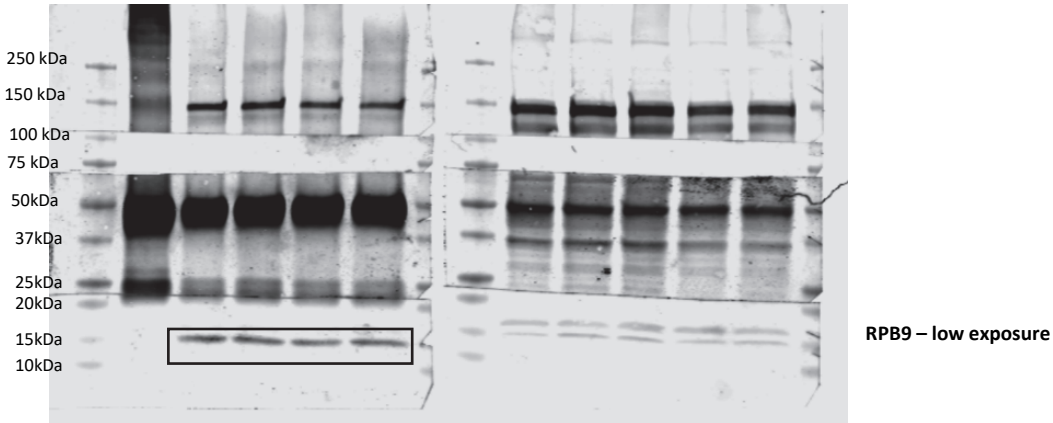

Extended data figure 6D(2)

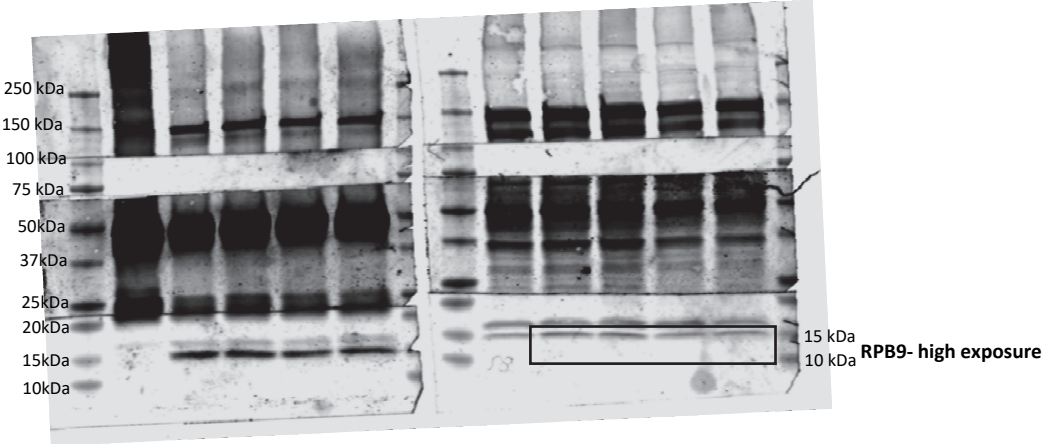

Extended data figure 6E

IP: P-Ser2-Pol II

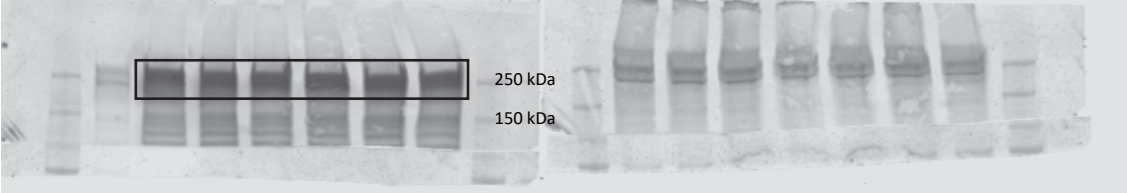

Pol II

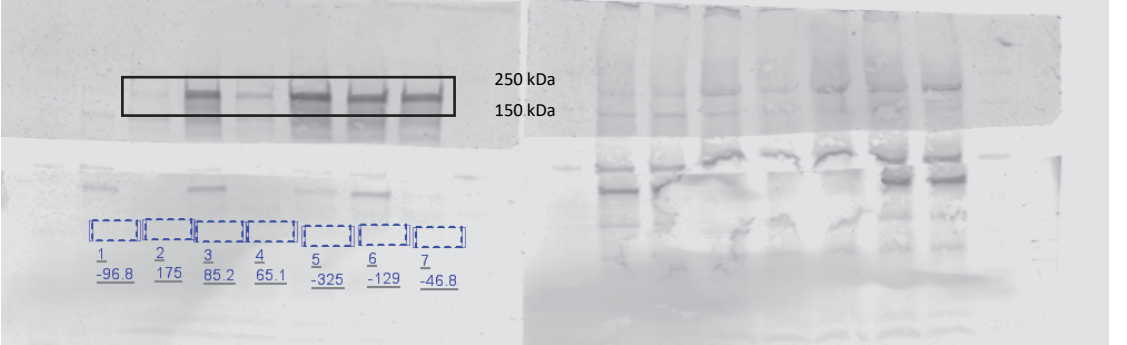

CSB

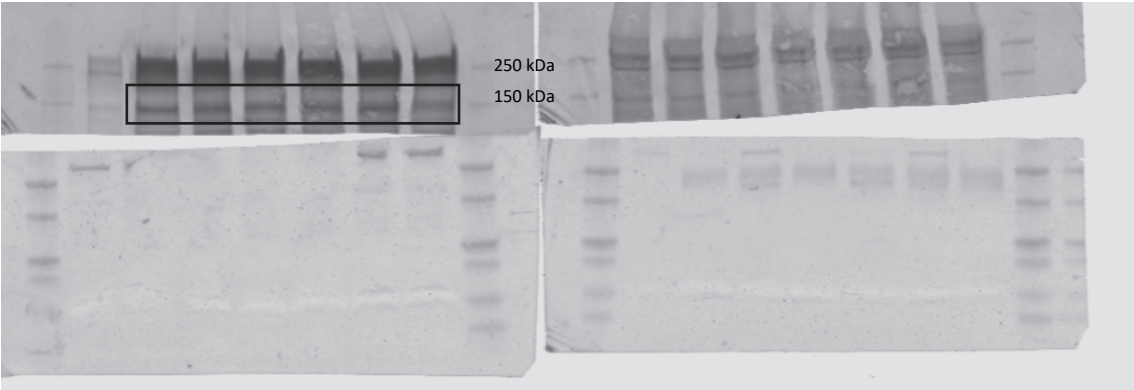

SPT5

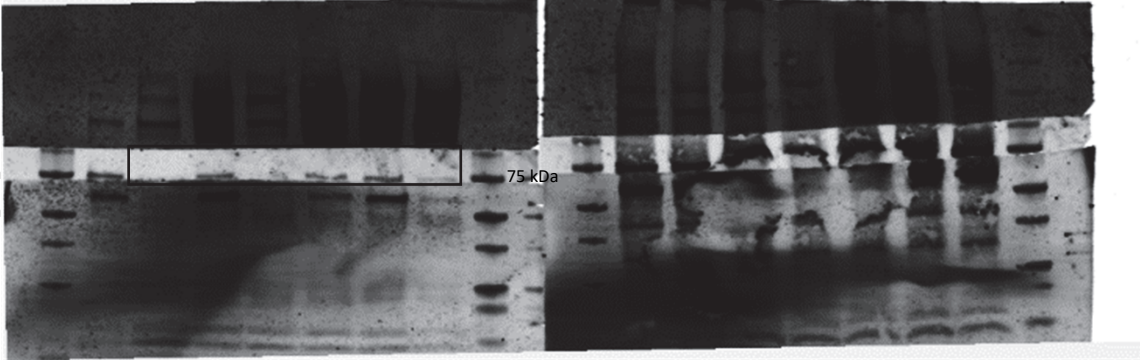

XPD

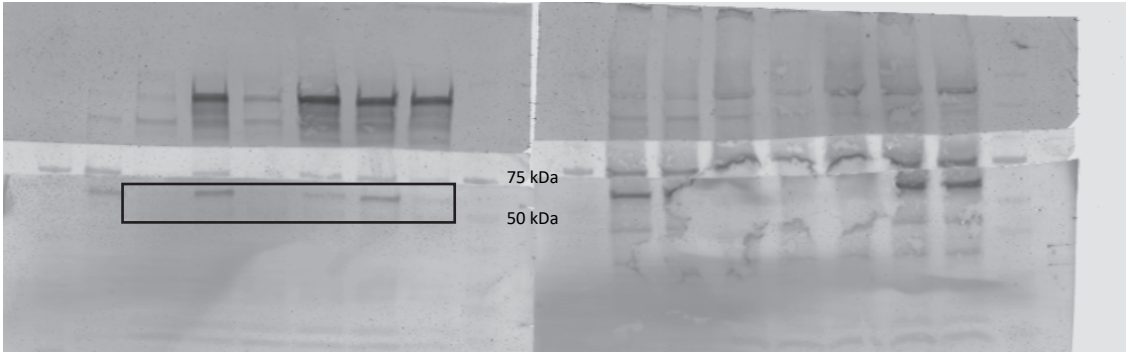

p62

Extended data figure  
6E(2)

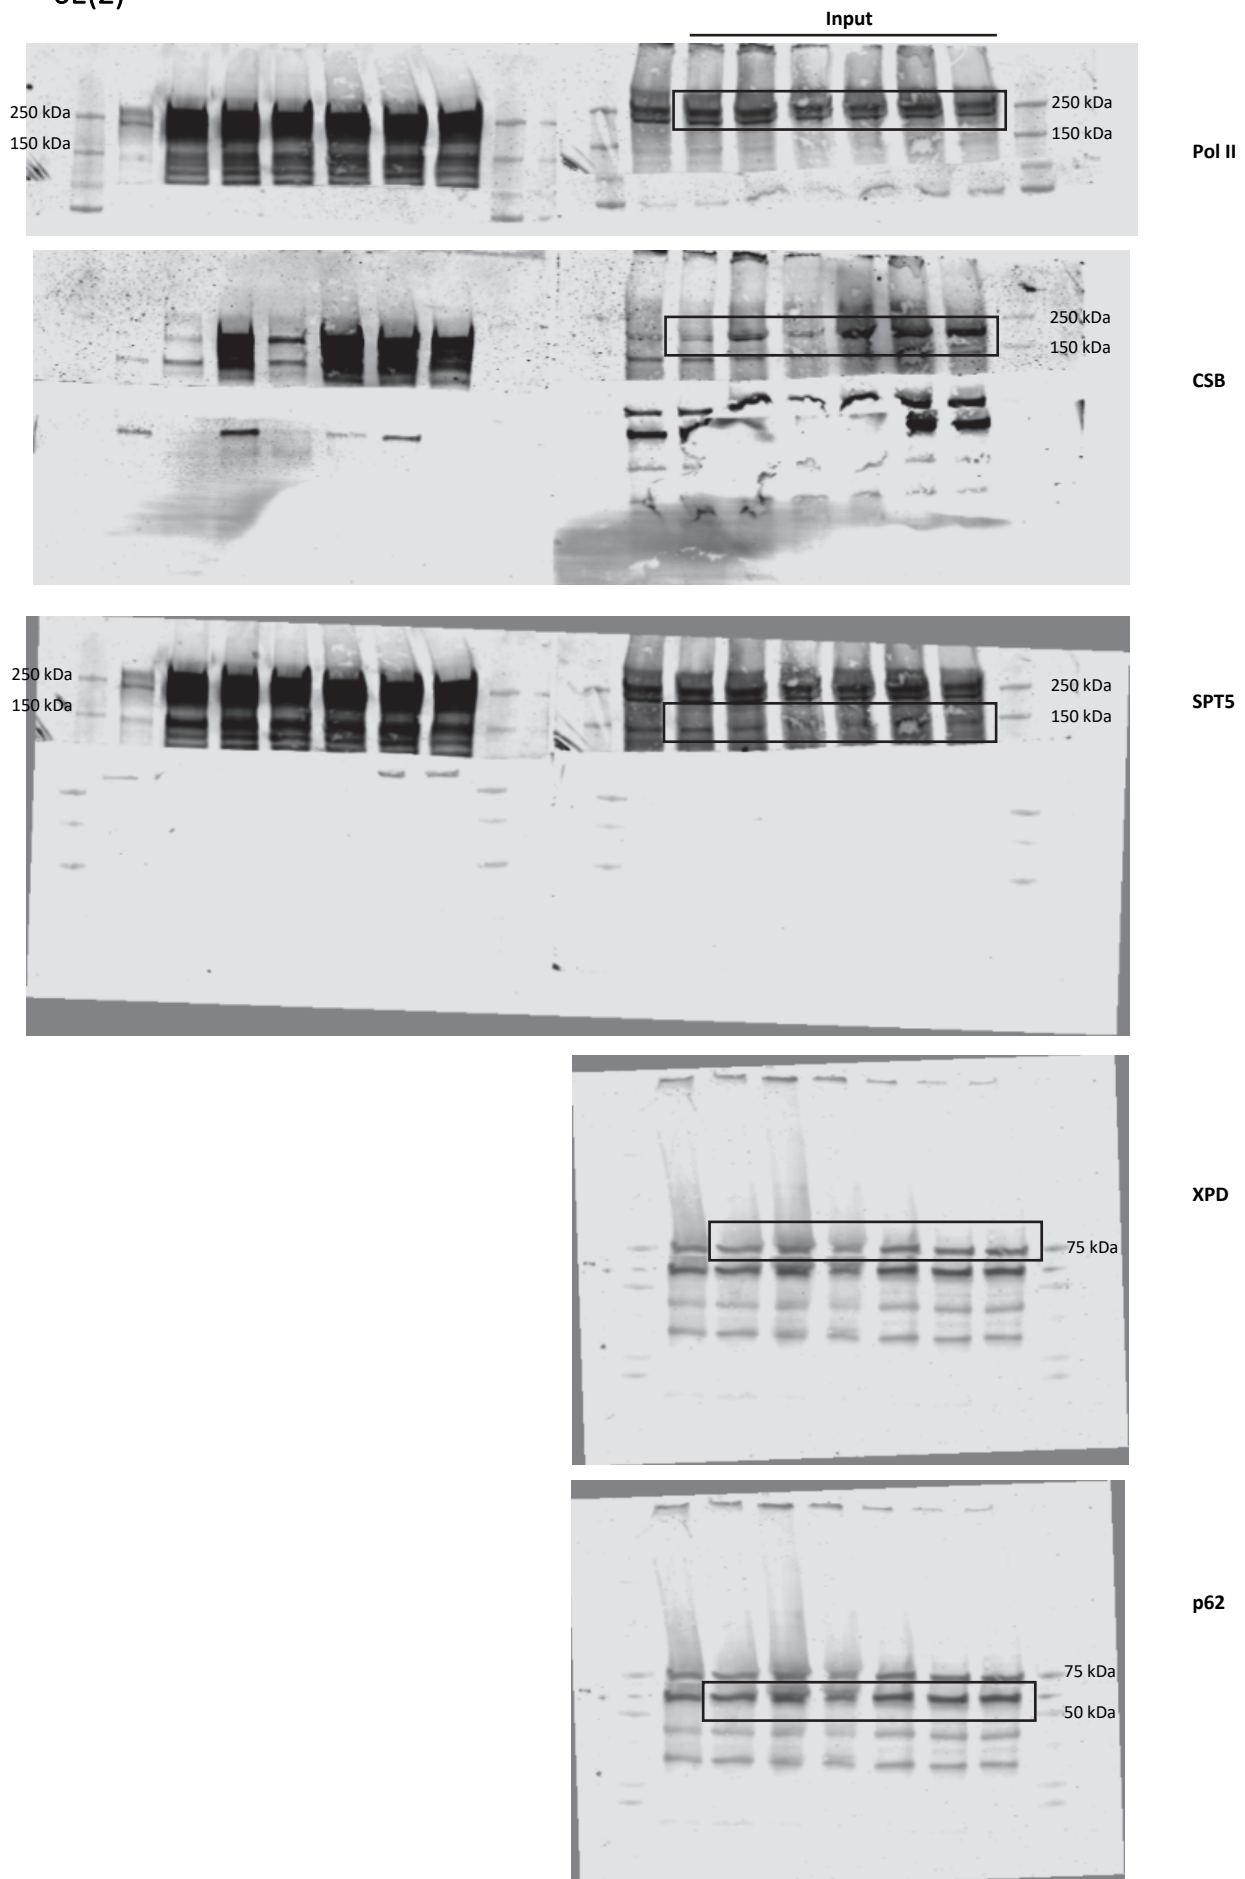

Supplement: NIHMS1715543-supplement-SourceGels_ExtendedFig6SourceGels_ExtendedFig1.pdf [file NIHMS1715543-supplement-SourceGels_ExtendedFig6SourceGels_ExtendedFig1.pdf]
