# Supplementary material
Source: PubMed Central journal article supplement (PMC8327757)

Extended data figure 1D

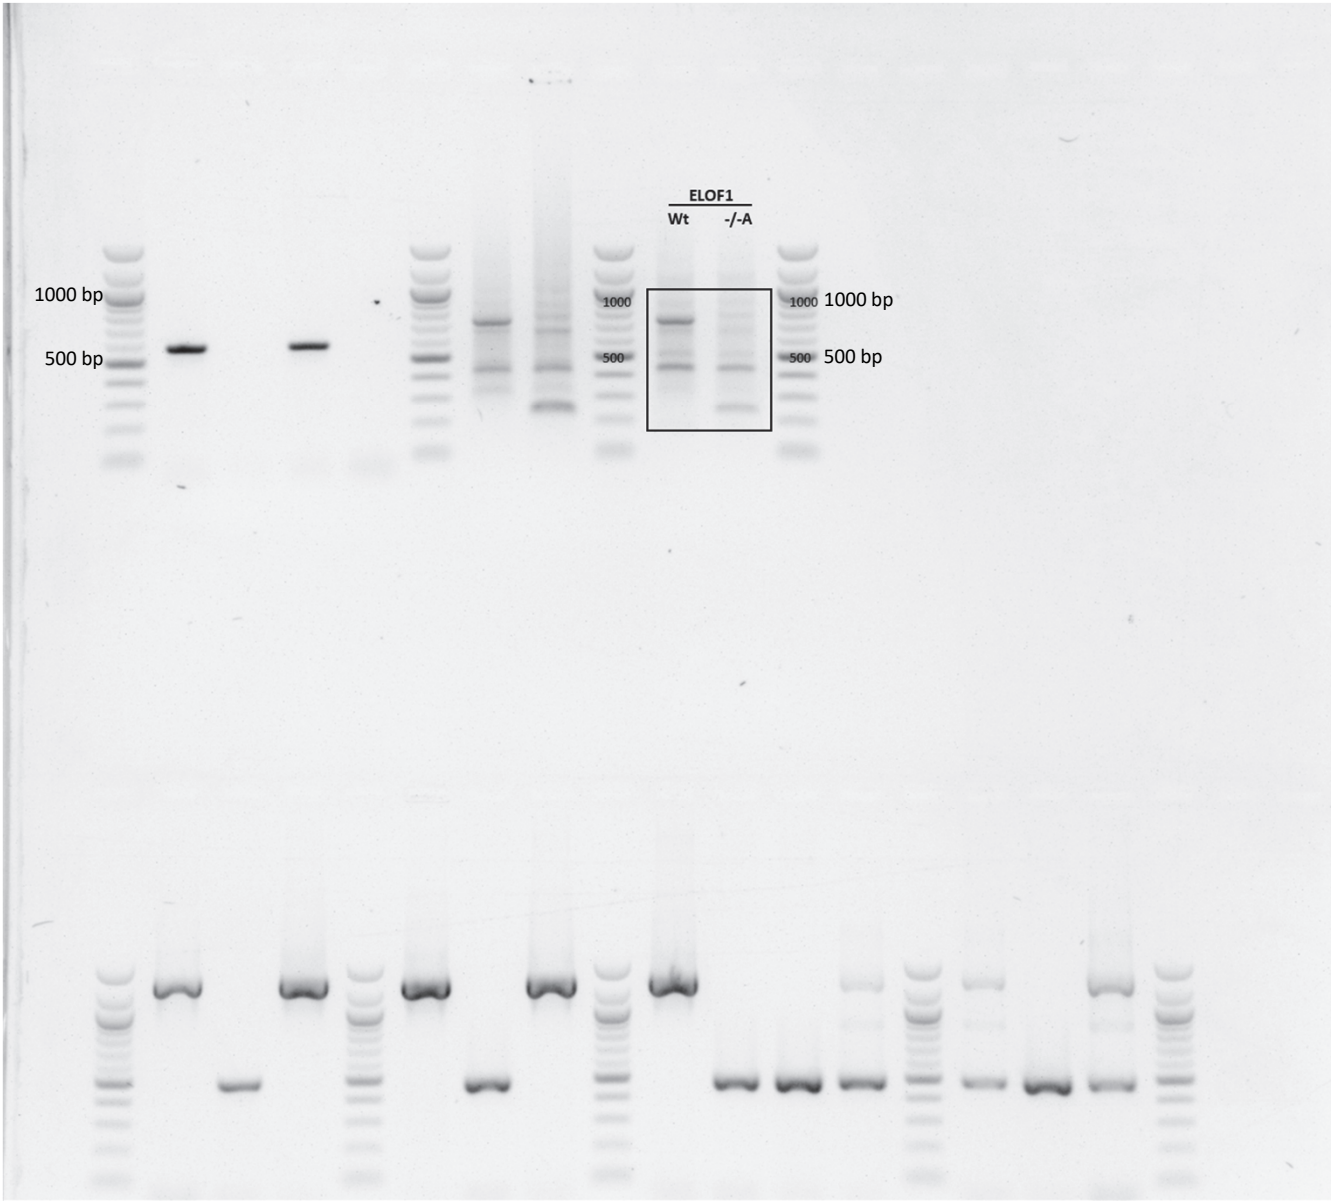

Extended data figure 1G

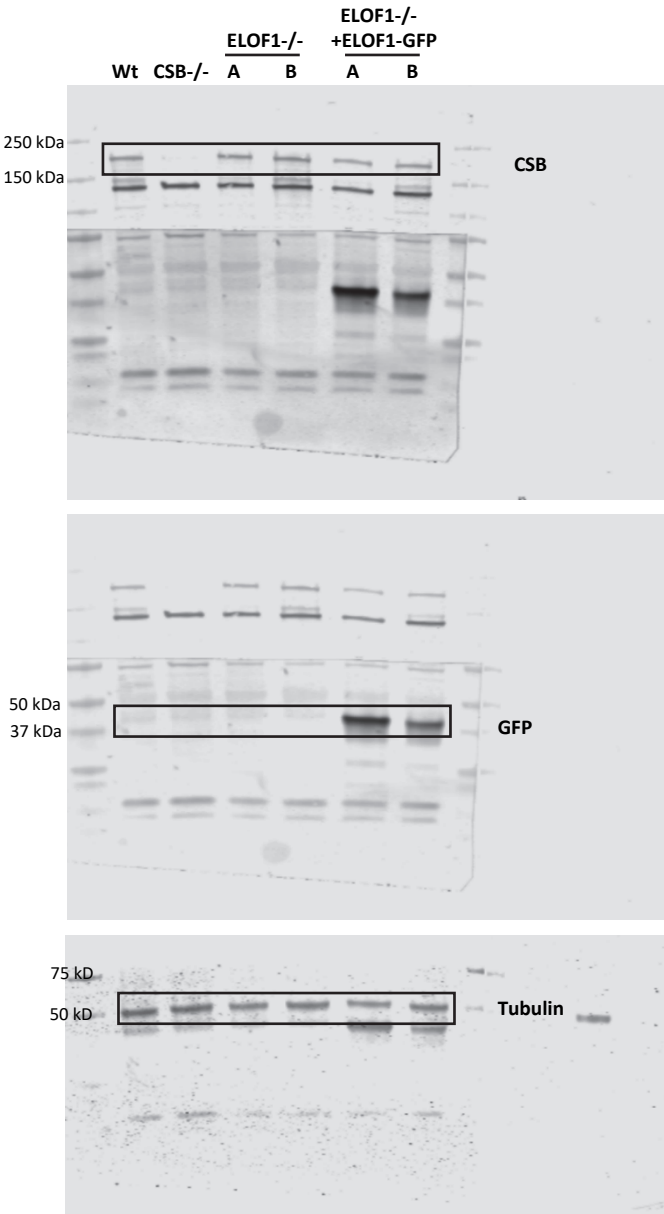

Extended data figure 11

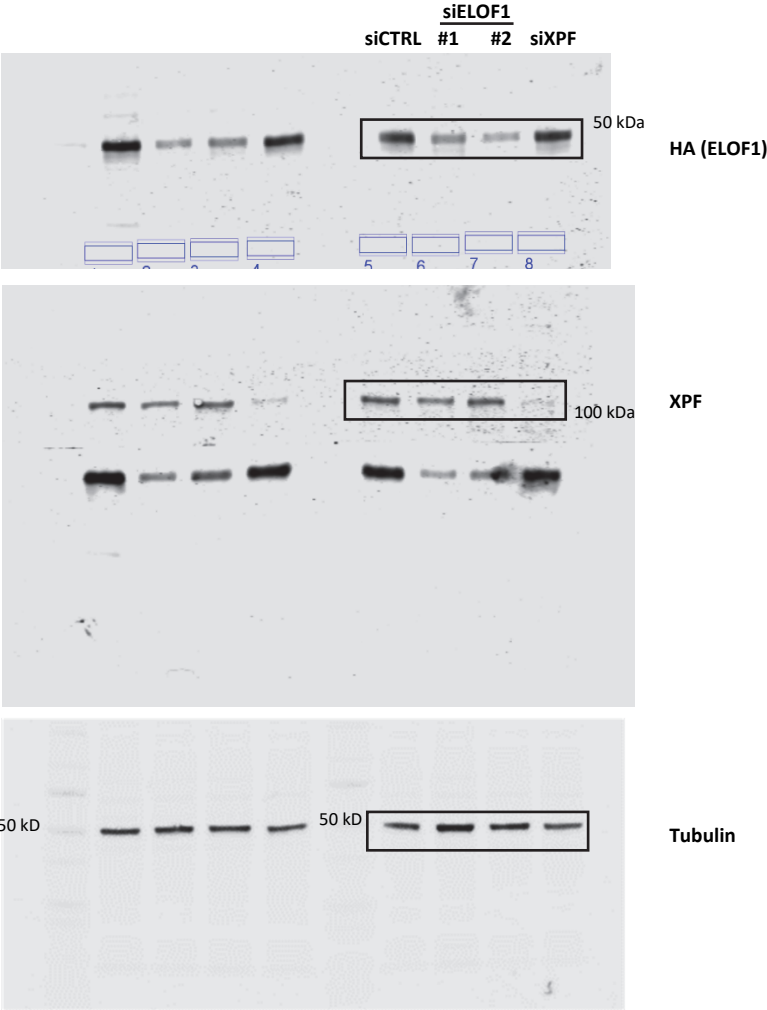

Extended data figure 1J

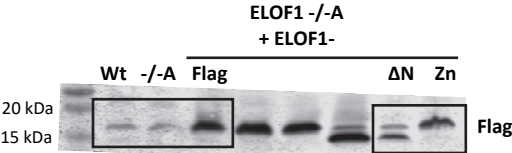

Supplement: NIHMS1715543-supplement-SourceGels_ExtendedFig1.pdf [file NIHMS1715543-supplement-SourceGels_ExtendedFig1.pdf]

Figure 2C

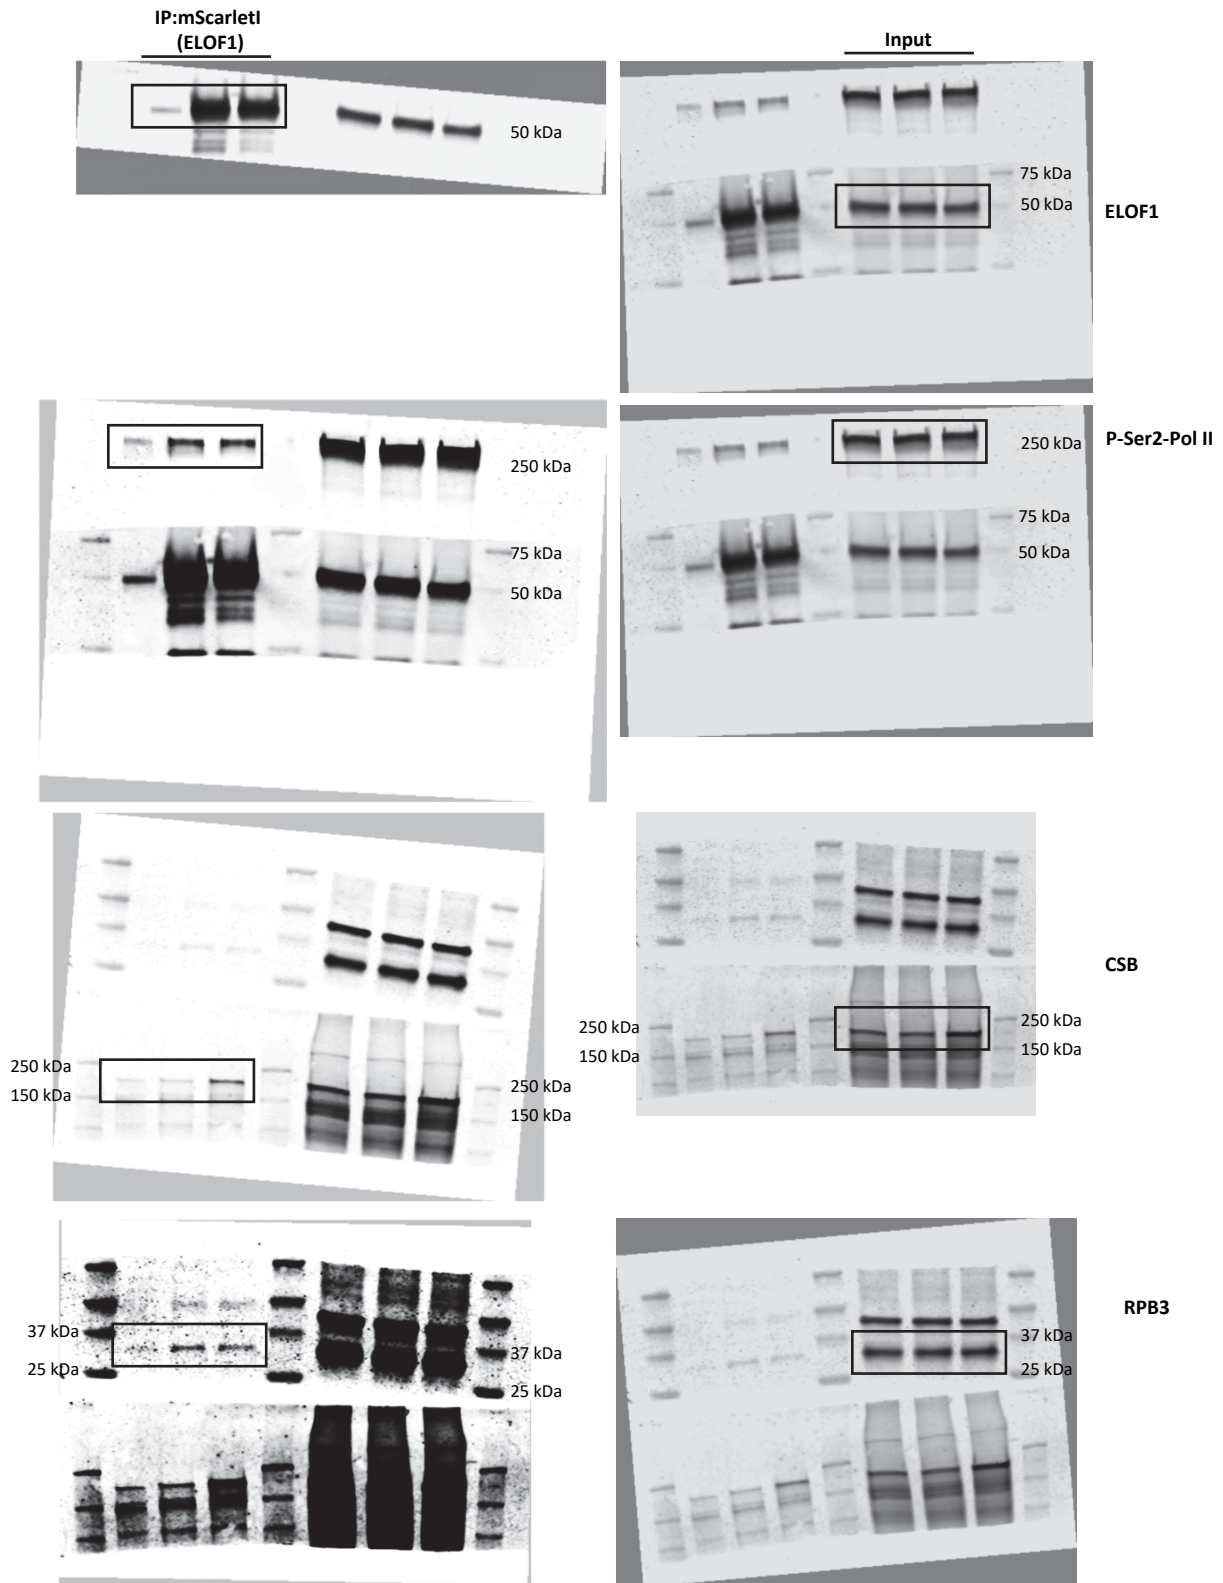

Supplement: NIHMS1715543-supplement-SourceGels_Fig2.pdf [file NIHMS1715543-supplement-SourceGels_Fig2.pdf]

Figure 6A (2)

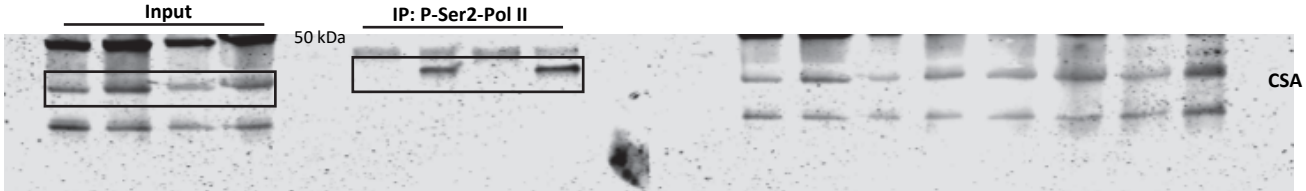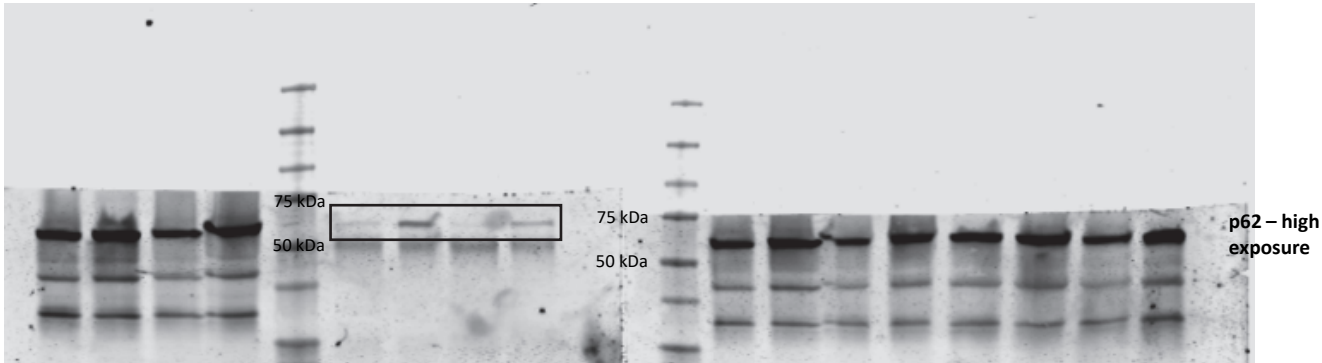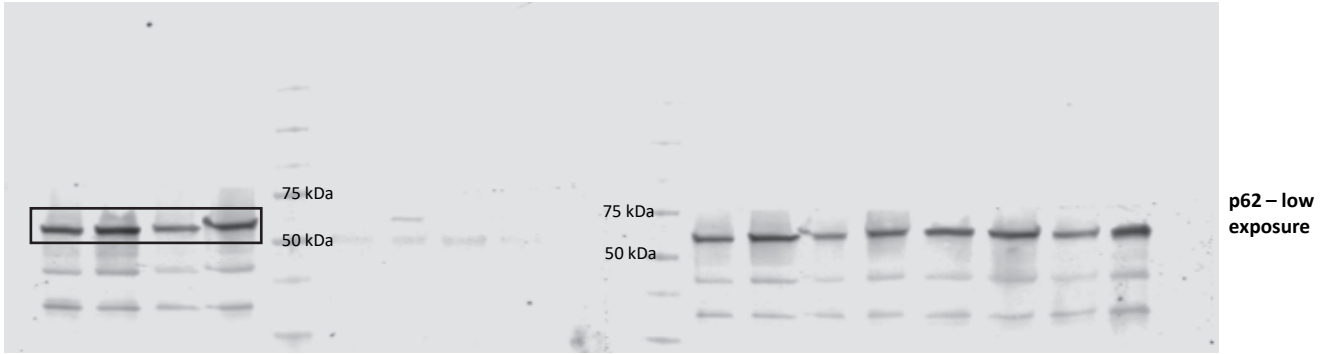

Figure 6C

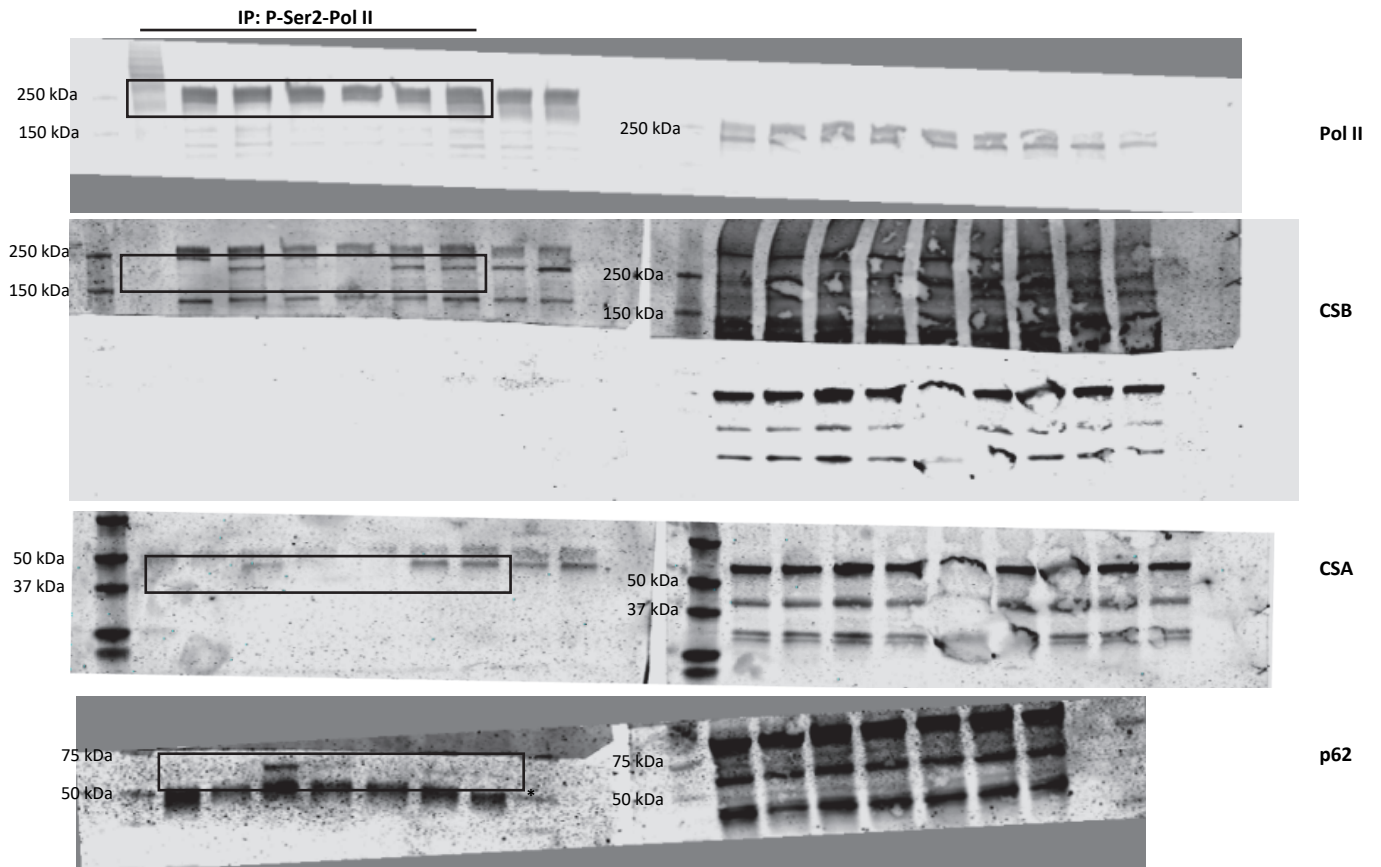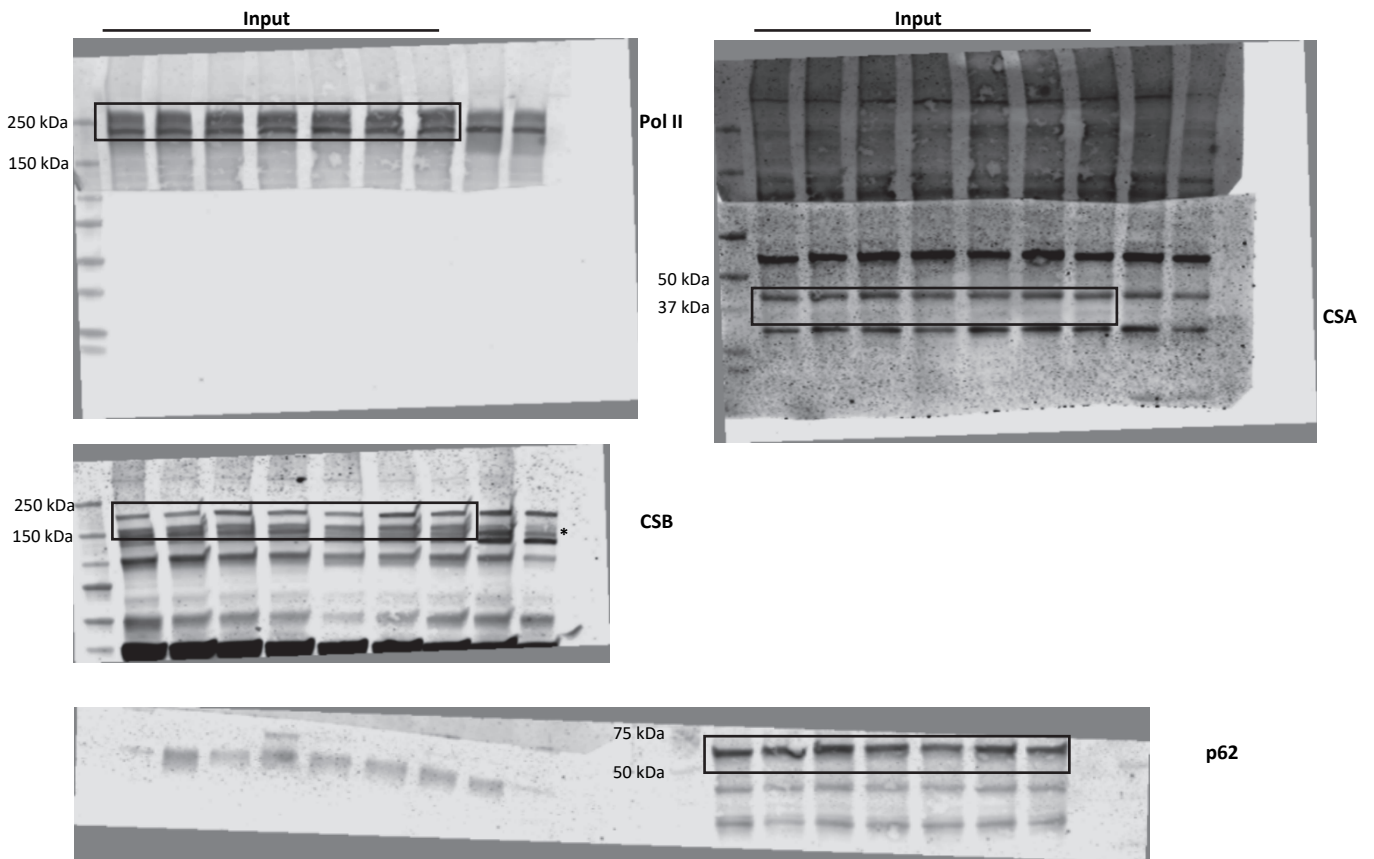

Figure 6F

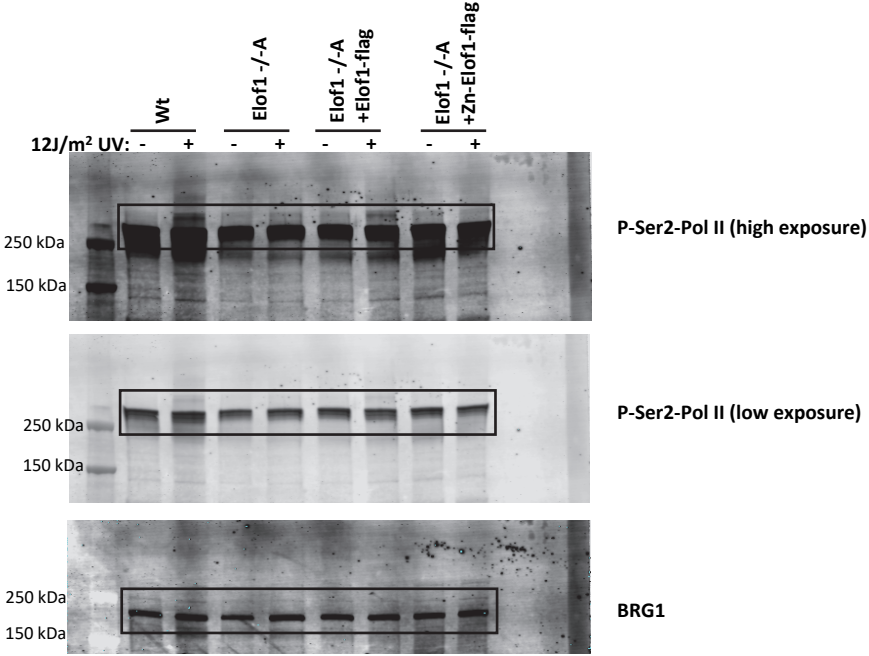

Supplement: NIHMS1715543-supplement-SourceGels_Fig6.pdf [file NIHMS1715543-supplement-SourceGels_Fig6.pdf]
